# Supplementary material for: Exploring the Construct Validity of Integrated Speaking Tasks: The Case of a Large-scale High-stakes Computer-based Listening-Speaking Task
Source: Research Square preprint supplement (doi:10.21203/rs.3.rs-7563159/v1), 2025-10-27
Supplement: Supplementary file 1 [file 107163f3f03fa8f47bd43f5d.docx]

**Appendices**

**Appendix A CELST —— Test A**

*Welcome to Computer-based English Listening and Speaking Test. CELST is a module of National Matriculation English Test (Guangdong version), consisting of three parts. Part A is Reading Aloud. In this part, you are required to watch a video clip and read after the speaker in the video. Part B is Role Play. In this part, you are required to act as a role and complete three communicative tasks: listen to a speaker, ask the speaker three questions and then answer five questions from the computer acting as another role. Part C is Retelling. In this part, you are required to listen to a monologue, and then retell what you have heard in your own words.*

**Part A Reading Aloud**

*In this part, you are required to watch a video clip and read after the speaker in the video.*

*(first reading)*

One of the most extraordinary civilisations the world has known disappeared. Millions of people died, some were savagely murdered. Why it happened is a mystery. This is the story of one man’s search for the truth. The Maya lived in what is today Southern Mexico and central America. They were deeply spiritual, worshipping dozens of gods of the sun and the moon, the earth and wind, fire and rain. From the jungles and plains rose cities and towns, great centers of worship, of art and learning. The Maya’s achievements were staggering. They developed their own writing, and mastered astronomy and mathematics.

*Now you have ONE minute to practice reading.*

*(one minute preparation; second reading)*

*Now listen to the speaker once again. And try to read after the speaker.*

One of the most extraordinary civilisations the world has known disappeared. Millions of people died, some were savagely murdered. Why it happened is a mystery. This is the story of one man’s search for the truth. The Maya lived in what is today Southern Mexico and central America. They were deeply spiritual, worshipping dozens of gods of the sun and the moon, the earth and wind, fire and rain. From the jungles and plains rose cities and towns, great centers of worship, of art and learning. The Maya’s achievements were staggering. They developed their own writing, and mastered astronomy and mathematics.

*Now read as the speaker in the video.*

**Part B Role Play**

*In this part, you are required to act as a role and complete three communicative tasks: listen to a speaker, ask the speaker three questions and then answer five questions.*

*Now listen to the speaker.*

*(Twenty-two seconds presentation for the background information and prompt.)*

情景介绍

角色： 你是Mary。

任务：（1）与Dr. Brown谈论颜色多购买行为的影响；

（2）根据谈话内容回答另一同学的提问。

生词：survey（调查）

(video clip broadcasting)

**W:** Good morning, Dr. Brown.

**M:** Good morning, Mary.

**W:** Haven’t seen you since last summer. What are you busy doing these days?

**M:** I have just written a book and got it published by the University Press.

**W:** Oh, great! What is the book about?

**M:** It is about how colors affect us in the world of advertising. It is called *Market Colors*.

**W:** That sounds interesting. You must have done a lot of research on people’s feelings about colors.

**M:** That’s very true. I have spent thirteen months on this book, doing surveys and interviews. I’ve had many interesting findings about the relationship between colors and buying decisions.

**W:** How do colors affect our buying behaviors?

**M:** People have different feelings about colors, and their feelings help them decide what to buy. For example, blue makes people feel peaceful, quiet, and it doesn’t create strong emotions. So it’s a favorite for banks and insurance companies. And for selling products, it’s often used to suggest something pure and fresh.

**W:** What color is more attractive to customers?

**M:** Well, you can sell almost anything with red. It’s a hot color, which suggests a feeling of energy and even excitement. It catches your attention. You often see red on magazine covers. But if you use it too much, it looks cheap and may make people tired.

**W:** Is green a popular color in advertising?

**M:** Surprisingly, green isn’t used much in advertising except for garden products. Although it’s friendly and cool, it can also be quite strong and many people associate it with unpleasant ideas.

*Now please ask the speaker three questions. You have twenty seconds to prepare the question. When you hear a beep, begin to ask question.*

*(Questions to be asked on the computer interface)*

1. 颜色怎样影响我们的购买行为？

2. 什么颜色对顾客更具吸引力？

3. 绿色是广告中流行的颜色吗？

*Now please get ready to answer the five questions. You have ten seconds to prepare the question. When you hear a beep, begin to ask question.*

*(Each question will be read twice. But it will not be presented on the computer interface.)*

*Please get ready to answer the five questions.*

4. How did Dr. Brown do his research?

5. How much time did Dr. Brown spend on his book?

6. What does blue suggest in advertising?

7. Why can’t we use red too much in advertising?

8. What color is suitable for garden products?

**Part C Story Retelling**

*In this part, you are required to listen to a monologue, and then retell what you have heard in your own words.*

*(Presentation for the background information and prompt. Broadcasted twice.)*

Part C Retelling

梗概：

校车司机突然晕倒，Tom快速反应踩刹车，救了全车人。

关键词： unconscious(昏迷) brake(刹车) reaction (反应) hero (英雄) reward (奖励)

**Answers:**

**Part A Reading Aloud**

One of the most extraordinary civilisations the world has known disappeared. Millions of people died, some were savagely murdered. Why it happened is a mystery. This is the story of one man’s search for the truth. The Maya lived in what is today Southern Mexico and central America. They were deeply spiritual, worshipping dozens of gods of the sun and the moon, the earth and wind, fire and rain. From the jungles and plains rose cities and towns, great centers of worship, of art and learning. The Maya’s achievements were staggering. They developed their own writing, and mastered astronomy and mathematics.

**Part B Role Play**

**Questions to raise:**

1. How do colors affect/influence our buying behaviors?

2. What color is more attractive to customers?

3. Is green a popular color for/in advertising/advertisements?

**Questions to answer:**

4. (Dr. Brown did his research) by doing surveys and interviews.

5. (Dr. Brown spent) thirteen months (on his book).

6. (It suggests) pure and fresh.

7. It makes things look cheap and makes people tired.

8. Green (is suitable for garden products).

**Part C Story Retelling**

**A Lucky Brake**

Tom liked everything about cars and often helped his father repair his old car. One morning, Tom was on the school bus with other children. They were chatting and laughing loudly as usual. But the bus driver was not feeling very well that day. While he was trying to stop the bus by the roadside, the driver suddenly became unconscious.

It all happened without any warning. The bus was out of control and started running off the road. The children on the bus were terrified and began screaming. Tom was sitting in the back of the bus, but he rushed to the front within seconds. He tried his best to move the bus driver aside, and stepped hard on the brakes. The bus finally stopped. Tom saved himself and all the other children from disaster.

The quick reaction of Tom made the news all over the country. He appeared on TV as a hero. His school hung a medal of honor around his neck. And the bus company gave him a toy bus as a reward. Tom’s father was very proud of his son. He promised to teach him how to drive when Tom was older.

**Appendix B Rating Rubrics**

**广东省普通高考《英语听说》试题 评分参考**

**Part A 模仿朗读评分标准**

| 档次 | 语音语调 | | 语速与内容 | |
| --- | --- | --- | --- | --- |
| 分值 | 标准 | 分值 | 标准 |
| A | 8--12 | 发音清晰、准确，语调正确、自然，语流连贯、流畅 | 6--8 | 按照原语速朗读，而且内容完整 (至多漏过三个单词) |
| B | 4--7 | 发音基本准确，语调基本正确，语流尚为连贯。 | 3--5 | 基本按照原语速朗读，漏过几个单词 |
| C | 0--3 | 大部分的音素发音不正确，语流不连贯。 | 0--2 | 不能按照原语速朗读，漏过一个不完整的句子或超过10个以上的单词 |

**Part B 角色扮演评分标准**

|  | 分值 | 标准 |
| --- | --- | --- |
| 语言 | 1 | 语法结构和选词正确 |
| 0.5 | 语法结构和选词基本正确，以下错误需要扣0.5分：  动词时态和语态错误  动词的及物性  主谓一致 |
| 0 | 出现严重的语法和选词错误，导致误解或不理解所表达的信息，比如：  疑问词错误  结构不完整，而且意义不连贯 |
| 信息 | 1 | 基本按照要求传递信息 |
| 0.5 | 传递了部分信息 |
| 0 | 不能按照要求传递信息 |

**Part C 角色扮演评分标准**

|  | 内容 | | 综合评分 | |
| --- | --- | --- | --- | --- |
| 评分  方式 | 按信息点评分，每个信息点1.5分 | | 根据内容、语言、流利和语音综合评分 | |
| 档次 | 分值 | 标准 | 分值 | 标准 |
| A | 1.5 | 完全正确 | 7-9 | - 忠实原文内容 - 语言得体性好、合乎规范 - 表达流利 - 语音语调不影响理解 |
| B | 0.5-1.0 | 基本正确 | 4-6 | - 基本复述了原文的主要内容 - 语言得体性较好、基本合乎规范（出现少许语言错误，但不影响理解） - 比较流利（复述过程出现短暂的间歇） - 出现一些语音语调的错误，但基本不影响理解 |
| C | 0 | 完全错误 | 0-3 | - 不能复述原文的主要内容 - 语言得体性较差，出现较多的语言错误 - 不够流利 - 语音语调影响理解 |
| 关于信息点 | 侧重信息，只要传达出信息就给分；  语言错误在“综合评分”中扣分 | | | |

信息点：

1. Tom liked cars and helped his father repair car.
2. Tom and other children were chatting and laughing on the school bus.
3. The bus driver did not feel well and suddenly became unconscious.
4. The bus was out of control/ran off the road and the children were terrified/ screamed.
5. Tom rushed to the front of the bus.
6. Tom moved the driver aside, and stepped on the brakes.
7. The bus stopped. Tom saved all the children.
8. The story made the news and Tom became a hero.
9. The bus company and the school gave Tom rewards.
10. Tom’s father was proud and promised to teach him drive.

**Appendix C** The coding scheme of test takers’ performances

| Parameter | | Parameter (abbreviation) | Data type |
| --- | --- | --- | --- |
| textual  measures | accuracy | ratio of error-free clauses (REFC) | ratio |
| ratio of correct verb forms (RCVF) | ratio |
| ratio of reported semantic units (RRSU) | ratio |
| complexity | number of clauses per T-unit (CpT) | ratio |
| mean length of T-unit (MLT) | ratio |
| number of clauses (NoC) | interval |
| number of T-units (NoT) | interval |
| type token ratio (TTR) | ratio |
| coherence | number of additives (ADD) | interval |
| number of comparatives (COM) | interval |
| number of temporals (TEM) | interval |
| number of consequentials (CON) | interval |
| number of internals (INT) | interval |
| fluency | number of syllables per minute (SpM) | interval |
| meaningful number of syllables per minute (MSpM) | interval |
| articulation rate (AR) | interval |
| mean length of run (MLR) | interval |
| number of dysfluency markers (DysM) | interval |
| ratio of repetition and self-correction (RRSC) | ratio |
| phonology | ratio of phoneme addition (RPA) | ratio |
| ratio of phoneme omitting (RPO) | ratio |
| ratio of mispronounced phonemes (RMP) | ratio |
| ratio of unintelligible fragments (RUiF) | ratio |
| pitch range (PR) | interval |
| ratio of misstressed words (RMS) | ratio |
| communicative  strategy use | reduction | number of message abandoned (MA) | interval |
| number of semantic reduction (SR) | interval |
| achievement | number of guessing (GUS) | interval |
| number of approximation (APP) | interval |
| number of paraphrasing (PAR) | interval |
| number of restructuring (RES) | interval |
| number of word coinage (WC) | interval |

**Appendix D** A description of inter-coder reliability

| Coding parameter | inter-coder reliability (Cranach’s α) | | |
| --- | --- | --- | --- |
| reading  aloud | role  play | story  retelling |
| number of correct verb forms | .970 | .996 | .989 |
| number of error-free clauses | .982 | .995 | .984 |
| number of verb forms | 1.000 | .998 | .987 |
| number of reported semantic units | .948 | .996 | .984 |
| number of additive conjunctions | / | .994 | .819 |
| number of comparative conjunctions | / | / | .944 |
| number of temporal conjunctions | / | / | .907 |
| number of consequential conjunctions | / | .955 | .847 |
| number of unmeaningful syllables | 1.000 | .938 | .904 |
| number of filled pauses | 1.000 | 1.000 | .952 |
| number of unfilled pauses | 0.872 | .979 | .976 |
| number of phoneme additions | .961 | .993 | .996 |
| number of phoneme omitting | .994 | .979 | .998 |
| number of mispronounced phonemes | .978 | .995 | .997 |
| number of unintelligible fragments | .989 | .998 | .992 |
| number of message abandoned | / | .896 | .814 |
| number of misstressed phonemes | 1.000 | .969 | .996 |
| number of semantic units reduced | .948 | .947 | .970 |
| number of guessing | / | / | .816 |
| number of approximation | / | / | 1.000 |
| number of paraphrasing | / | / | .860 |
| number of restructuring | / | / | .848 |
| maximum pitch | 1.000 | 1.000 | 1.000 |
| minimum pitch | 1.000 | 1.000 | 1.000 |
| total time | 1.000 | 1.000 | 1.000 |
| number of utterances between 0.3 seconds and above | 1.000 | 1.000 | 1.000 |
| speaking time | 1.000 | 1.000 | 1.000 |

**Appendix E** Preliminary data of conducting multiple regression analysis

A description of preliminary data before conducting multiple regression

|  | Pearson correlation | | | | | | |  | collinearity statisticsa | |
| --- | --- | --- | --- | --- | --- | --- | --- | --- | --- | --- |
|  | score | MA | SR | App | GUS | PAR | RES |  | Tolerance | VIF |
| score | 1.00 |  |  |  |  |  |  |  |  |  |
| MA | -.18 | 1.00 |  |  |  |  |  |  | .95 | 1.06 |
| SR | -.19 | .06 | 1.00 |  |  |  |  |  | .98 | 1.03 |
| App | .04 | .05 | -.01 | 1.00 |  |  |  |  | .98 | 1.02 |
| GUS | .07 | .22 | .06 | .03 | 1.00 |  |  |  | .92 | 1.08 |
| PAR | .13 | .10 | .11 | .11 | .15 | 1.00 |  |  | .89 | 1.12 |
| RES | .27 | .03 | .12 | .10 | .15 | .28 | 1.00 |  | .90 | 1.12 |

1. These value refers to those in the second model (four parameters of achievement). For those in the first model (two parameters of message reduction), the value of tolerance and VIF are all 1.00.


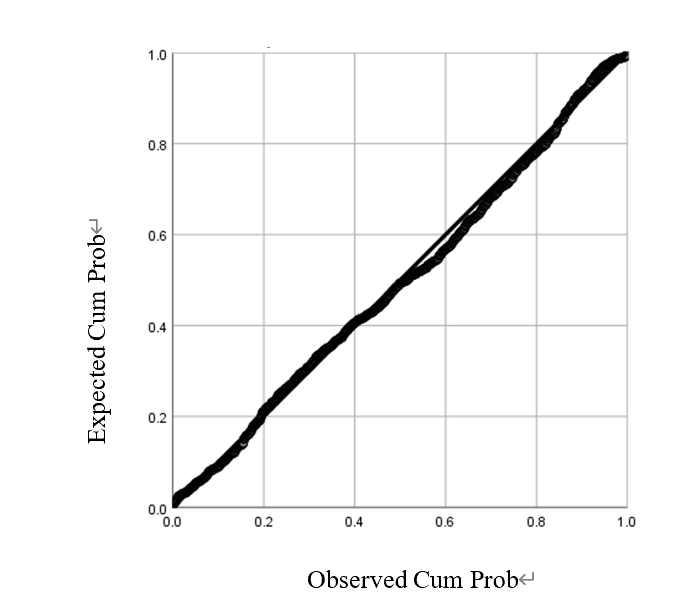


Normal P-P plot of regression standardized residual (DV: score)
